# Supplementary material for: Antimicrobial LDPE/EVOH Layered Films Containing Carvacrol Fabricated by Multiplication Extrusion
Source: PubMed Central journal article supplement (PMC6403741; doi:10.3390/polym10080864), 2018-08-04

Supplementary Materials

## Antimicrobial LDPE/EVOH layered films containing carvacrol fabricated by multiplication extrusion

Max Krepker <sup>1</sup>, Cong Zhang <sup>2</sup>, Nadav Nitzan <sup>1</sup>, Ofer Prinz-Setter <sup>1</sup>, Naama Massad-Ivanir <sup>1</sup>, Andrew Olah <sup>2</sup>, Eric Baer <sup>2</sup>, and Ester Segal <sup>1,3\*</sup>

<sup>1</sup> Department of Biotechnology and Food Engineering, Technion – Israel Institute of Technology, Haifa 3200003, Israel

<sup>2</sup> Center for Layered Polymeric Systems, Department of Macromolecular Science and Engineering, Case Western Reserve University, Cleveland, OH 44106-7202, USA

<sup>3</sup> The Russell Berrie Nanotechnology Institute, Technion – Israel Institute of Technology, Haifa 3200003, Israel

\* Correspondence: esegal@technion.ac.il

Academic Editor: name

Received: date; Accepted: date; Published: date

Figure S1 presents characteristic images of multi-layered (LDPE/carvacrol)/EVOH and (LDPE/[HNTs/carvacrol])/EVOH films (comprising of 9 and 65 layers) fabricated by the forced-assembly layer-multiplying coextrusion technique. The films are were transparent and continuous with no apparent defects.

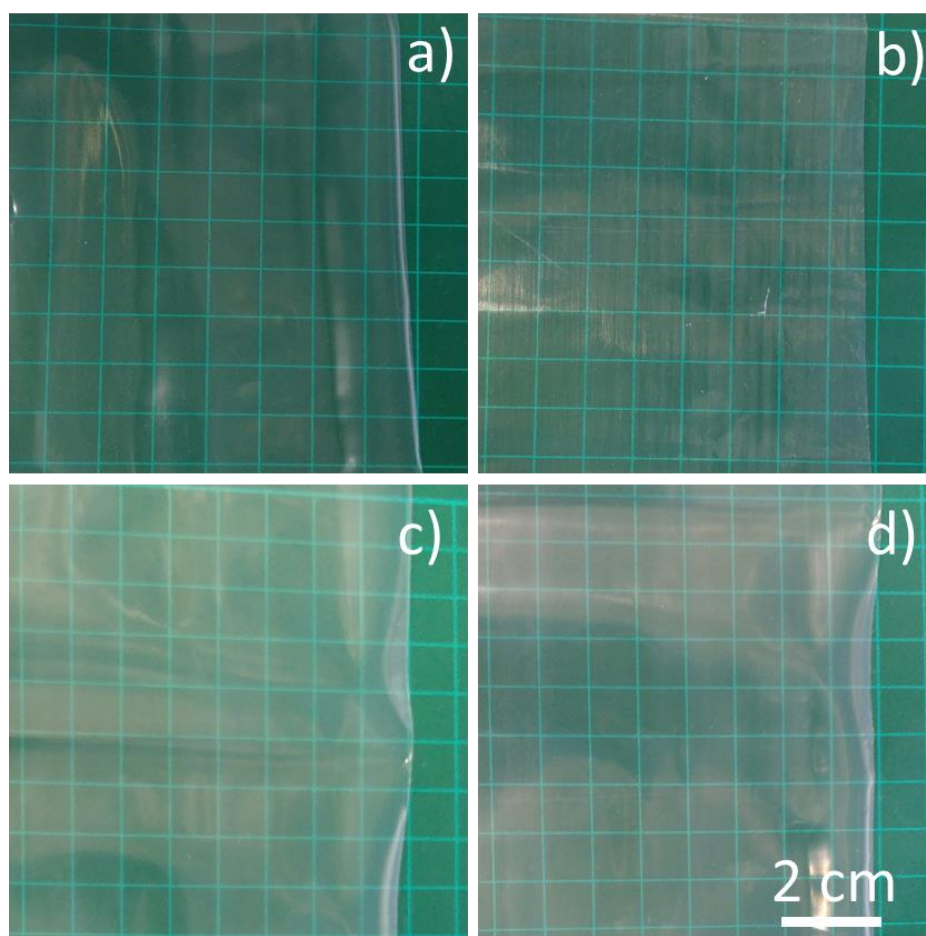

**Figure S1.** Characteristic images of the multilayered films prepared by forced-assembly layer-multiplying co-extrusion a) 9-layered (LDPE/carvacrol)/EVOH; b) 65-layered (LDPE/carvacrol)/EVOH; c) 9-layered (LDPE/[HNTs/carvacrol])/EVOH; and d) 65-layered (LDPE/[HNTs/carvacrol])/EVOH.

© 2017 by the authors. Submitted for possible open access publication under the terms and conditions of the Creative Commons Attribution (CC BY) license (<http://creativecommons.org/licenses/by/4.0/>).

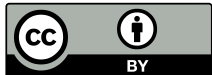

Supplement: polymers-10-00864-s001.pdf [file polymers-10-00864-s001.pdf]
